# Supplementary material for: Antithrombotic therapy after myocardial infarction in patients with atrial fibrillation undergoing percutaneous coronary intervention
Source: Oxford University Press journal article supplement (doi:10.1093/ehjcvp/pvx033), 2017-11-04
Supplement: supplemental_material_pvx033.pdf [file supplemental_material_pvx033.pdf]

## Supplemental Material

Antithrombotic therapy after myocardial infarction in patients with atrial fibrillation  
undergoing percutaneous coronary intervention

Gorav Batra, MD; Leif Friberg, MD, PhD; David Erlinge, MD, PhD; Stefan James, MD, PhD;  
Tomas Jernberg, MD, PhD; Bodil Svennblad, PhD; Lars Wallentin, MD, PhD; Jonas Oldgren, MD, PhD

**Table 1.** Other antithrombotic agents or no antithrombotic agents at discharge

| <b>ATC-code</b>                       | <b>Substance</b>                    | <b>Nr. of dispenses</b> | <b>Nr. of patients</b> |
|---------------------------------------|-------------------------------------|-------------------------|------------------------|
| B01AB01                               | Heparin                             | 8                       | 3                      |
| B01AB04                               | Dalteparin                          | 491                     | 85                     |
| B01AB05                               | Enoxaparin                          | 187                     | 44                     |
| B01AB10                               | Tinzaparin                          | 202                     | 42                     |
| B01AC                                 | Cilostazol                          | 9                       | 4                      |
| B01AC07                               | Dipyridamole                        | 59                      | 27                     |
| B01AC22                               | Prasugrel                           | 470                     | 112                    |
| B01AC24                               | Ticagrelor                          | 1,291                   | 317                    |
| B01AC30                               | Acetylsalicylic acid + Dipyridamole | 31                      | 14                     |
| B01AE07                               | Dabigatran etexilate                | 87                      | 30                     |
| B01AF01                               | Rivaroxaban                         | 6                       | 5                      |
| B01AF02                               | Apixaban                            | 3                       | 2                      |
| B01AX05                               | Fondaparinux                        | 5                       | 3                      |
| <b>Total number of patients</b>       |                                     |                         | <b>642</b>             |
| No antithrombotic agents at discharge |                                     |                         | 343                    |
| <b>Total</b>                          |                                     |                         | <b>985</b>             |

Patients who dispensed other antithrombotic agents than aspirin, clopidogrel or warfarin during the follow-up period of one year were excluded from the analysis. However, patients who dispensed small packages ( $\leq 20$ ) of heparin, dalteparin, enoxaparin or tinzaparin during the follow-up period were included in the analysis. If no antithrombotic agents were used at discharge (aspirin, clopidogrel or warfarin) the patients were excluded from the analysis. Table S1 depicts what other antithrombotic agents, except aspirin, clopidogrel and warfarin that were dispensed and the number of dispenses. The number of patients excluded from the analysis is also given in the Table S1.

**Table 2.** Comorbidities

| <b>Comorbidity</b>                    | <b>ICD-10 code</b>                                                                                                                                                                                                                  | <b>Comments</b>                                                                                                |
|---------------------------------------|-------------------------------------------------------------------------------------------------------------------------------------------------------------------------------------------------------------------------------------|----------------------------------------------------------------------------------------------------------------|
| Bleeding events                       | I850, K226, K250, K252, K254, K256, K260, K262, K264, K266, K270, K272, K274, K276, K280, K284, K286, K290, K625, K661, K920, K921, K922, I60, I61, I62, N02, R310, R311, R318, R040, R041, R042, R048, R049, R58, T810, I983, D629 | Defined from the National Patient Registry.                                                                    |
| Cancer diagnosis within 3 years       | C14 – C20                                                                                                                                                                                                                           | Defined from the National Patient Registry.                                                                    |
| Chronic obstructive pulmonary disease | J40, J41, J42, J43, J44, J45, J46, J47                                                                                                                                                                                              | Defined from the National Patient Registry.                                                                    |
| Congestive heart failure              | I50, K761, I971, I110, P290                                                                                                                                                                                                         | Defined from the National Patient Registry or according to SWEDEHEART.                                         |
| Dementia                              | G30, G31                                                                                                                                                                                                                            | Defined from the National Patient Registry.                                                                    |
| Diabetes mellitus                     | E10, E11, E12, E13, E14                                                                                                                                                                                                             | Defined from the National Patient Registry or diabetes/diabetes medication at arrival according to SWEDEHEART. |
| Hypertension                          | I10 – I15                                                                                                                                                                                                                           | Defined from the National Patient Registry or according to SWEDEHEART.                                         |
| Liver disease                         | K70, K71, K72, K73, K74, K75, K76, K77                                                                                                                                                                                              | Defined from the National Patient Registry.                                                                    |
| Myocardial infarction                 | I21, I22                                                                                                                                                                                                                            | Defined from the National Patient Registry or according to SWEDEHEART.                                         |
| Renal disease                         | N17, N18, N19, N990, O084, I120, I131, I132, T795, P960                                                                                                                                                                             | Defined from the National Patient Registry.                                                                    |
| Peripheral systemic emboli            | I74                                                                                                                                                                                                                                 | Defined from the National Patient Registry.                                                                    |
| Peripheral vascular disease           | I70, I71, I72, I73                                                                                                                                                                                                                  | Defined from the National Patient Registry.                                                                    |
| Ischemic stroke                       | I63, I64                                                                                                                                                                                                                            | Defined from the National Patient Registry.                                                                    |
| Transient ischemic attack             | G45                                                                                                                                                                                                                                 | Defined from the National Patient Registry.                                                                    |

Abbreviations: ICD-10, International Classification of Diseases 10<sup>th</sup> Revision

**Table 3.** Variables reflecting in-hospital course

| <b>Variable</b>                                                      | <b>Comments</b>                                                               |
|----------------------------------------------------------------------|-------------------------------------------------------------------------------|
| Admission year                                                       | Defined from SWEDEHEART.                                                      |
| Age                                                                  | Defined from SWEDEHEART.                                                      |
| Gender                                                               | Defined from SWEDEHEART.                                                      |
| Arrival antithrombotic medication (aspirin, clopidogrel or warfarin) | Defined from the National Dispensed Drug Registry or according to SWEDEHEART. |
| PCI indication (NSTEMI, STEMI)                                       | Defined from SWEDEHEART.                                                      |
| Coronary angiography                                                 | Defined from SWEDEHEART.                                                      |
| PCI                                                                  | Defined from SWEDEHEART.                                                      |
| Procedure related medication, Heparin                                | Defined from SWEDEHEART.                                                      |
| Procedure related medication, LMWH                                   | Defined from SWEDEHEART.                                                      |
| Procedure related medication, Fondaparinux                           | Defined from SWEDEHEART.                                                      |
| Procedure related medication, Bivalirudin                            | Defined from SWEDEHEART.                                                      |
| Procedure related medication, GPIIb/IIIa inhibitors                  | Defined from SWEDEHEART.                                                      |
| PCI characteristics, vascular access approach                        | Defined from SWEDEHEART.                                                      |
| PCI characteristics, finding                                         | Defined from SWEDEHEART.                                                      |
| PCI characteristics, number of stents                                | Defined from SWEDEHEART.                                                      |
| PCI characteristics, stent group (BMS, DES)                          | Defined from SWEDEHEART.                                                      |

Abbreviations: BMS, bare metal stent; DES, drug eluting stent; GPIIb/IIIa, glycoprotein lib/IIIa; LMWH, low-molecular-weight heparin; NSTEMI, non-ST-elevation myocardial infarction; PCI, percutaneous coronary intervention; STEMI, ST-elevation myocardial infarction.

**Table 4.** CHA<sub>2</sub>DS<sub>2</sub>-VASc score(1)

| <b>Risk factor</b>                                                                                                                            | <b>Score</b> |
|-----------------------------------------------------------------------------------------------------------------------------------------------|--------------|
| <u>C</u> ongestive heart failure (Table S2)                                                                                                   | 1            |
| <u>H</u> ypertension (Table S2)                                                                                                               | 1            |
| <u>A</u> ge ≥ 75 years (Table S3)                                                                                                             | 2            |
| <u>D</u> iabetes mellitus (Table S2)                                                                                                          | 1            |
| <u>S</u> troke/Transient ischemic attack/Thromboembolism (ischemic stroke, transient ischemic attack or peripheral systemic emboli, Table S2) | 2            |
| <u>V</u> ascular disease (prior myocardial infarction, peripheral artery disease, or aortic plaque, Table S2)                                 | 1            |
| <u>A</u> ge 65-74 years (Table S3)                                                                                                            | 1            |
| <u>S</u> ex category, female gender (Table S3)                                                                                                | 1            |

**Table 5.** Definition of outcome

| <b>Outcome</b>                                           | <b>ICD-10 code</b>                                                                                                                                                                                                                         | <b>Comments</b>                                                                     |
|----------------------------------------------------------|--------------------------------------------------------------------------------------------------------------------------------------------------------------------------------------------------------------------------------------------|-------------------------------------------------------------------------------------|
| All-cause mortality                                      | -                                                                                                                                                                                                                                          | Defined from the Swedish Cause of Death Registry.                                   |
| Myocardial infarction                                    | I21, I22                                                                                                                                                                                                                                   | Defined from the National Patient Registry and the Swedish Cause of Death Registry. |
| Myocardial infarction (or death due to coronary disease) | I21, I22 (I20-I25)                                                                                                                                                                                                                         | Defined from the National Patient Registry and the Swedish Cause of Death Registry. |
| Stent thrombosis                                         | -                                                                                                                                                                                                                                          | Defined from SWEDEHEART.                                                            |
| Ischemic stroke                                          | I63, I64                                                                                                                                                                                                                                   | Defined from the National Patient Registry and the Swedish Cause of Death Registry. |
| Major bleeding events                                    | I60, I61, I62, I850, K226, K250, K252, K254, K256, K260, K262, K264, K266, K270, K272, K274, K276, K280, K284, K286, K290, K625, K661, K920, K921, K922, N02, R310, R311, R318, R040, R041, R042, R048, R049, R58, T810, I983, D629, DR029 | Defined from the National Patient Registry and the Swedish Cause of Death Registry. |
| Intracranial bleeding events                             | I60, I61, I62                                                                                                                                                                                                                              | Defined from the National Patient Registry and the Swedish Cause of Death Registry. |
| Gastrointestinal bleeding events                         | I850, K226, K250, K252, K254, K256, K260, K262, K264, K266, K270, K272, K274, K276, K280, K284, K286, K290, K625, K661, K920, K921, K922                                                                                                   | Defined from the National Patient Registry and the Swedish Cause of Death Registry. |

**Table 6.** Outcome in relation to antithrombotic therapy at discharge, intention-to-treat analysis

| Drug                                                                                   | Nr. of patients | Nr. of events | Incidence rate (95% CI) | Unadjusted HR (95% CI) | Adjusted HR (95% CI) |
|----------------------------------------------------------------------------------------|-----------------|---------------|-------------------------|------------------------|----------------------|
| <b>Composite of mortality, myocardial infarction or ischemic stroke, 0– 90 days</b>    |                 |               |                         |                        |                      |
| Dual AP                                                                                | 4,328           | 467           | 47.4 (43.2 - 51.8)      | 1.00                   | 1.00                 |
| Single AP                                                                              | 874             | 151           | 80.5 (68.4 - 94.1)      | 1.66 (1.39 - 2.00)     | 1.43 (1.19 - 1.73)   |
| Warfarin monotherapy                                                                   | 111             | 16            | 67.8 (40.3 - 107.5)     | 1.40 (0.85 - 2.30)     | 1.22 (0.74 - 2.02)   |
| Aspirin + warfarin                                                                     | 134             | 18            | 60.0 (36.9 - 92.9)      | 1.26 (0.79 - 2.02)     | 1.22 (0.76 - 1.95)   |
| Clopidogrel + warfarin                                                                 | 516             | 56            | 47.7 (36.4 - 61.5)      | 1.01 (0.76 - 1.33)     | 0.97 (0.73 - 1.28)   |
| Triple therapy                                                                         | 1,153           | 99            | 37.1 (30.4 - 45.0)      | 0.79 (0.64 - 0.98)     | 0.82 (0.66 - 1.02)   |
| <b>Composite of mortality, myocardial infarction or ischemic stroke, 91 – 365 days</b> |                 |               |                         |                        |                      |
| Dual AP                                                                                | 3,950           | 526           | 19.5 (17.9 - 21.2)      | 1.00                   | 1.00                 |
| Single AP                                                                              | 575             | 87            | 23.5 (18.9 - 28.8)      | 1.19 (0.95 - 1.50)     | 1.03 (0.82 - 1.30)   |
| Warfarin monotherapy                                                                   | 128             | 9             | 19.5 (17.9 - 21.2)      | 0.54 (0.28 - 1.04)     | 0.52 (0.27 - 1.00)   |
| Aspirin + warfarin                                                                     | 558             | 59            | 15.2 (11.7 - 19.4)      | 0.78 (0.60 - 1.02)     | 0.72 (0.55 - 0.94)   |
| Clopidogrel + warfarin                                                                 | 454             | 44            | 14.0 (10.34 - 18.7)     | 0.72 (0.53 - 0.98)     | 0.62 (0.45 - 0.84)   |
| Triple therapy                                                                         | 1,155           | 101           | 12.4 (10.1 - 15.0)      | 0.64 (0.52 - 0.79)     | 0.66 (0.53 - 0.82)   |
| <b>Major bleeding events, 0 – 90 days</b>                                              |                 |               |                         |                        |                      |
| Dual AP                                                                                | 4,328           | 81            | 7.8 (6.3 - 9.7)         | 1.00                   | 1.00                 |
| Single AP                                                                              | 874             | 18            | 9.0 (5.5 - 13.9)        | 1.14 (0.68 - 1.90)     | 0.98 (0.59 - 1.64)   |
| Warfarin monotherapy                                                                   | 111             | 2             | 8.0 (1.6 - 25.8)        | 1.02 (0.25 - 4.13)     | 0.87 (0.21 - 3.53)   |
| Aspirin + warfarin                                                                     | 134             | 6             | 18.9 (7.9 - 39.0)       | 2.41 (1.05 - 5.51)     | 2.37 (1.03 - 5.43)   |
| Clopidogrel + warfarin                                                                 | 516             | 17            | 13.9 (8.4 - 21.7)       | 1.77 (1.05 - 2.99)     | 1.69 (1.00 - 2.86)   |
| Triple therapy                                                                         | 1,153           | 43            | 15.7 (11.5 - 20.9)      | 2.00 (1.38 - 2.90)     | 2.07 (1.42 - 3.01)   |
| <b>Major bleeding events, 91 – 365 days</b>                                            |                 |               |                         |                        |                      |
| Dual AP                                                                                | 3,950           | 86            | 3.1 (2.5 - 3.8)         | 1.00                   | 1.00                 |
| Single AP                                                                              | 575             | 13            | 3.4 (1.9 - 5.6)         | 1.09 (0.61 - 1.94)     | 1.01 (0.56 - 1.82)   |
| Warfarin monotherapy                                                                   | 128             | 1             | 1.12 (0.1 - 5.2)        | 0.36 (0.05 - 2.60)     | 0.34 (0.05 - 2.47)   |
| Aspirin + warfarin                                                                     | 558             | 16            | 4.0 (2.4 - 6.4)         | 1.31 (0.77 - 2.23)     | 1.24 (0.72 - 2.12)   |
| Clopidogrel + warfarin                                                                 | 454             | 11            | 3.4 (1.8 - 5.9)         | 1.11 (0.59 - 2.07)     | 1.01 (0.54 - 1.90)   |
| Triple therapy                                                                         | 1,155           | 46            | 5.6 (4.1 - 7.4)         | 1.82 (1.27 - 2.60)     | 1.79 (1.24 - 2.57)   |

Abbreviations: AP, antiplatelet therapy; CI, confidence interval; HR, hazard ratio

**Table 7.** Outcome in relation to antithrombotic therapy over time including patients until their first change in antithrombotic regimen

| Drug                                                                    | Person years | Nr. of events | Event rate per 100 Person years (95% CI) | Unadjusted HR (95% CI) | Adjusted HR (95% CI) |
|-------------------------------------------------------------------------|--------------|---------------|------------------------------------------|------------------------|----------------------|
| <b>Composite of mortality, myocardial infarction or ischemic stroke</b> |              |               |                                          |                        |                      |
| Dual AP                                                                 | 2,072.8      | 672           | 32.4 (30.0 - 34.9)                       | 1.00                   | 1.00                 |
| Single AP                                                               | 189.5        | 129           | 68.1 (57.1 - 80.6)                       | 1.54 (1.27 - 1.86)     | 1.34 (1.11 - 1.62)   |
| Warfarin monotherapy                                                    | 46.5         | 15            | 32.3 (18.9 - 51.9)                       | 1.01 (0.61 - 1.69)     | 0.91 (0.54 - 1.51)   |
| Aspirin + warfarin                                                      | 66.1         | 22            | 33.3 (21.5 - 49.5)                       | 1.06 (0.69 - 1.62)     | 1.04 (0.68 - 1.60)   |
| Clopidogrel + warfarin                                                  | 193.5        | 63            | 32.6 (25.2 - 41.4)                       | 0.90 (0.69 - 1.16)     | 0.84 (0.65 - 1.09)   |
| Triple therapy                                                          | 344.6        | 108           | 31.3 (25.8 - 37.7)                       | 0.76 (0.62 - 0.93)     | 0.79 (0.64 - 0.97)   |
| <b>Major bleeding events</b>                                            |              |               |                                          |                        |                      |
| Dual AP                                                                 | 2,224.7      | 121           | 5.4 (4.5 - 6.5)                          | 1.00                   | 1.00                 |
| Single AP                                                               | 200.3        | 16            | 8.0 (4.8 - 12.7)                         | 1.17 (0.69 - 1.97)     | 1.09 (0.64 - 1.84)   |
| Warfarin monotherapy                                                    | 49.5         | 1             | 2.0 (0.2 - 9.4)                          | 0.38 (0.05 - 2.70)     | 0.34 (0.05 - 2.41)   |
| Aspirin + warfarin                                                      | 70.1         | 7             | 10.0 (4.5 - 19.6)                        | 1.85 (0.86 - 3.96)     | 1.80 (0.84 - 3.86)   |
| Clopidogrel + warfarin                                                  | 202.3        | 16            | 7.9 (4.7 - 12.5)                         | 1.34 (0.79 - 2.25)     | 1.27 (0.75 - 2.14)   |
| Triple therapy                                                          | 359.6        | 50            | 13.9 (10.4 - 18.2)                       | 2.14 (1.53 - 3.00)     | 2.20 (1.56 - 3.09)   |

Abbreviations: AP, antiplatelet therapy; CI, confidence interval; HR, hazard ratio



**Table 8.** Outcome in relation to antithrombotic therapy over time based on estimated maintenance dosage for warfarin of 28.91 mg per week(2)

| Drug                                                                                   | Person years | Nr. of events | Event rate per 100 Person years (95% CI) | Unadjusted HR (95% CI) | Adjusted HR (95% CI) |
|----------------------------------------------------------------------------------------|--------------|---------------|------------------------------------------|------------------------|----------------------|
| <b>Composite of mortality, myocardial infarction or ischemic stroke, 0 – 90 days</b>   |              |               |                                          |                        |                      |
| Dual AP                                                                                | 984.6        | 486           | 49.4 (45.1 - 53.9)                       | 1.00                   | 1.00                 |
| Single AP                                                                              | 147.1        | 126           | 85.7 (71.7 - 101.6)                      | 1.57 (1.30 - 1.91)     | 1.38 (1.13 - 1.68)   |
| Warfarin monotherapy                                                                   | 23.2         | 19            | 82.1 (51.1 - 125.5)                      | 1.70 (1.07 - 2.69)     | 1.55 (0.98 - 2.46)   |
| Aspirin + warfarin                                                                     | 78.2         | 22            | 28.1 (18.1 - 41.8)                       | 0.81 (0.53 - 1.25)     | 0.80 (0.52 - 1.23)   |
| Clopidogrel + warfarin                                                                 | 112.7        | 52            | 46.1 (34.8 - 60.0)                       | 0.93 (0.70 - 1.23)     | 0.90 (0.67 - 1.19)   |
| Triple therapy                                                                         | 262.5        | 104           | 39.6 (32.6 - 47.8)                       | 0.81 (0.65 - 1.00)     | 0.85 (0.69 - 1.06)   |
| <b>Composite of mortality, myocardial infarction or ischemic stroke, 91 – 365 days</b> |              |               |                                          |                        |                      |
| Dual AP                                                                                | 1,698.9      | 366           | 21.5 (19.4 - 23.8)                       | 1.00                   | 1.00                 |
| Single AP                                                                              | 1,200.2      | 229           | 19.1 (16.7 - 21.7)                       | 1.04 (0.87 - 1.23)     | 0.99 (0.83 - 1.17)   |
| Warfarin monotherapy                                                                   | 441.3        | 50            | 11.3 (8.5 - 14.8)                        | 0.64 (0.47 - 0.86)     | 0.57 (0.42 - 0.78)   |
| Aspirin + warfarin                                                                     | 700.1        | 94            | 13.4 (10.9 - 16.4)                       | 0.71 (0.56 - 0.89)     | 0.70 (0.55 - 0.88)   |
| Clopidogrel + warfarin                                                                 | 261.7        | 40            | 15.3 (11.1 - 20.6)                       | 0.74 (0.53 - 1.02)     | 0.68 (0.49 - 0.94)   |
| Triple therapy                                                                         | 319.4        | 57            | 17.8 (13.7 - 22.9)                       | 0.76 (0.57 - 1.01)     | 0.81 (0.60 - 1.07)   |
| <b>Major bleeding events, 0 – 90 days</b>                                              |              |               |                                          |                        |                      |
| Dual AP                                                                                | 1,031.8      | 84            | 8.1 (6.5 - 10.0)                         | 1.00                   | 1.00                 |
| Single AP                                                                              | 155.5        | 16            | 10.3 (6.1 - 16.3)                        | 1.20 (0.70 - 2.05)     | 1.07 (0.62 - 1.84)   |
| Warfarin monotherapy                                                                   | 24.5         | 2             | 8.2 (1.6 - 26.1)                         | 1.03 (0.25 - 4.21)     | 0.94 (0.23 - 3.87)   |
| Aspirin + warfarin                                                                     | 82.1         | 8             | 9.7 (4.6 - 18.4)                         | 1.50 (0.72 - 3.11)     | 1.49 (0.72 - 3.11)   |
| Clopidogrel + warfarin                                                                 | 117.7        | 13            | 11.1 (6.2 - 18.4)                        | 1.35 (0.76 - 2.42)     | 1.28 (0.71 - 2.31s)  |
| Triple therapy                                                                         | 275.2        | 44            | 16.0 (11.8 - 21.3)                       | 1.97 (1.37 - 2.85)     | 2.07 (1.42 - 3.03)   |
| <b>Major bleeding events, 91 – 365 days</b>                                            |              |               |                                          |                        |                      |
| Dual AP                                                                                | 1,765.7      | 65            | 3.7 (2.9 - 4.7)                          | 1.00                   | 1.00                 |
| Single AP                                                                              | 1,225.5      | 36            | 2.9 (2.1 - 4.0)                          | 0.86 (0.57 - 1.31)     | 0.85 (0.56 - 1.29)   |
| Warfarin monotherapy                                                                   | 450.2        | 12            | 2.7 (1.5 - 4.5)                          | 0.79 (0.43 - 1.46)     | 0.74 (0.40 - 1.36)   |
| Aspirin + warfarin                                                                     | 716.6        | 27            | 3.8 (2.5 - 5.4)                          | 1.09 (0.69 - 1.72)     | 1.05 (0.66 - 1.68)   |
| Clopidogrel + warfarin                                                                 | 270.8        | 12            | 4.4 (2.4 - 7.5)                          | 1.22 (0.66 - 2.26)     | 1.15 (0.62 - 2.14)   |
| Triple therapy                                                                         | 340.1        | 21            | 6.2 (3.9 - 9.3)                          | 1.63 (1.00 - 2.67)     | 1.62 (0.99 - 2.65)   |

Abbreviations: AP, antiplatelet therapy; CI, confidence interval; HR, hazard ratio

## References

1. Lip GYH, Nieuwlaat R, Pisters R, Lane DA, Crijns HJGM. Refining clinical risk stratification for predicting stroke and thromboembolism in atrial fibrillation using a novel risk factor-based approach: the euro heart survey on atrial fibrillation. *Chest*. 2010;137:263–72.
2. Svensson P, Rosenqvist M, Andersson P, Andersson B, Christersson C, Själander A, et al. Årsrapport Auricula 2013. UCR. 2013.
